# Supplementary material
Source: Springer Nature journal article supplement (https://www.springermedizin.de/resource/supplementary/12936_2013_2763_MOESM2_ESM.pdf/9544208)
Supplement: MOESM2 [file 9544208]

9558 patients presented to the hospital

2124 (22.2%) patients had malaria

1985 (93.5%) had uncomplicated malaria

139 (6.5%) patients had severe malaria

113 (81.3%) had severe *P. falciparum* malaria

26 (18.7%) patients had severe *P. vivax* malaria

Hypotension (34, 30.1%), cerebral malaria (20, 17.7%), convulsions (17, 15.0%), hypoglycaemia (13, 11.5%), hyperparasitaemia 13(13, 11.5%), jaundice (11, 9.7%), severe anaemia (7, 6.2%), bleeding (4, 3.5%), renal impairment (1, 1.0%), more than one criterion (23, 20.6%).

Hypotension (4, 15.4%), cerebral malaria (3, 11.5%), convulsions (1, 3.8%), hypoglycaemia (2, 7.7%), hyperparasitaemia (1, 3.8%), jaundice (3, 11.5%), severe anaemia (3, 11.5%), bleeding (2, 7.7%), renal impairment (0, 0%), more than one criterion (4, 15.4%).
